# Supplementary material for: The Analgesic Effect of Electroencephalographic Neurofeedback for People With Chronic Pain: Protocol for a Systematic Review and Meta-analysis
Source: PubMed Central journal article supplement (PMC7582146; doi:10.2196/22821), 2020-10-08
Supplement: resprot_v9i10e22821_app2.pdf [file resprot_v9i10e22821_app2.pdf]

**Search strategy through OVID for MEDLINE, Embase, and PsycInfo  
(Restricted to Humans and English Language)**

**MEDLINE (OVID), Embase (OVID), PsycINFO (OVID)**

- 1 exp pain/
- 2 ((chronic\* or back or musculoskel\* or intractabl\* or neuropath\* or phantom limb or fantom limb or neck or myofasc\* or temporomandib\* joint\* or temperomandib\* joint\* or tempromandib\* joint\* or central or post\*stroke or complex or regional or spinal cord) adj4 pain\*).tw.
- 3 (sciatica or back-ache or back\*ache or lumbago or fibromyalg\* or (trigemin\* adj2 neuralg\*) or (herp\* adj2 neuralg\*) or (diabet\* adj2 neuropath\*) or (reflex adj4 dystroph\*) or (sudeck\* adj2 atroph\*) or causalg\* or whip-lash or whip\*lash or whiplash or polymyalg\* or (failed back adj4 surg\*) or (failed back adj4 syndrome\*).tw.
- 4 or/1-3
- 5 exp electroencephalography/
- 6 (electroencephalogra\* or EEG\* or quantitative EEG or QEEG\*).tw.
- 7 or/5-6
- 8 exp neurofeedback/
- 9 (neuro\*feedback or biofeedback or bio\*feedback or neuromodulat\* or neuro\*modulat\* or neurotherapy or neuro\*therapy or BCI\* or brain\*computer interface or BMI\* or brain\*machine interface).tw.
- 10 or/8-9
- 11 4 and 7 and 10
